# Supplementary material for: Pharmacy Students’ Perceptions and Stigma Surrounding Naloxone Use in Patients with Opioid Use Disorder: A Mixed Methods Evaluation
Source: MDPI journal article supplement (doi:10.3390/pharmacy8040205), 2020-11-03
Supplement: s1 [file s1]

# **An exploratory study of pharmacy students' perceptions of opioid prescribing and naloxone knowledge**

Principal Investigator:

Alina Cernasev, PharmD, PhD

Co-Investigators:

Kenneth C. Hohmeier, Pharm.D., Director of Community Affairs

Michael Veve, Pharm.D., MPH

Elizabeth Hall, Pharm.D.

Q1 How would you describe your overall health?

- (1) Excellent
- (2) Very Good
- (3) Good
- (4) Average
- (5) Poor

Q2 How satisfied are you with your dental health?

- (1) Extremely satisfied
- (2) Moderately satisfied
- (3) Slightly satisfied
- (4) Neither satisfied nor unsatisfied
- (5) Slightly unsatisfied
- (6) Moderately unsatisfied
- (7) Extremely unsatisfied

Q3 How would you rate your physical health?

- (1) Excellent
- (2) Very Good
- (3) Good
- (4) Average
- (5) Poor

**Part 1: Opioids**

- 4) Are you currently a pharmacy intern?
  - (1) Yes
  - (2) No
  
- 5) If yes, in what setting(s) are you working?
  - (1) Retail
  - (2) Hospital
  - (3) Long term facility
  - (4) Mail order
  - (5) Other
  
- 6) How long have you been working at your current pharmacy-related job?
  
- 7) When working in a pharmacy as an intern, how often are you asked by your patients if the pharmacy carries certain opioids or has certain quantities of opioids in stock?
  - (1) Weekly
  - (2) Monthly
  - (3) Quarterly
  - (4) Never
  
- 8) How often do you interact with patients receiving opioid prescriptions ?
  - (1) Weekly
  - (2) Monthly
  - (3) Quarterly
  - (4) Never

17) For each of the following statements, please indicate the extent to which you agree or disagree. Answers: (1) Strongly agree, (2) Disagree, (3) Somewhat agree, (4) Agree, (5) Strongly disagree

Q1: When there is not a clear solution for a patient with addiction, the pharmacy team usually consults with a physician.

Q2: When I suspect the dose is too high for an opioid prescription, I usually consult with the pharmacist to further address it.

Q3: Information about a patient's prescription history is important to know when filling opioid prescriptions.

Q4: When counseling on opioid prescriptions, I usually use a loud voice, and words such as "abuse" or "overdose" to explain the risk of addiction to the patient.

Q5: When I work as an intern, I believe that patients coming to fill multiple opioid prescriptions might have developed addiction.

Q6: When a patient picks up an opioid prescription, it has no impact on my interaction with him/her.

Q7: When a patient picks up a prescription for naloxone, it does not influence the way I interact with him/her.

Q8: When I work as an intern, I never think of the fact that patients have been diagnosed with addiction.

Q9: Most of my colleagues believe that patients with multiple opioid prescriptions might show signs of addiction disorder.

Q10: It is important for me to participate in additional courses focused on opioid addiction and treatment care options to better serve my future patients.

### **Part 3: Stigma Manifestation**

18) What is your comfort level in continuing a friendship if you found out your colleague in your class is abusing opioids?

- (1) Very comfortable
- (2) Somewhat comfortable
- (3) Neutral
- (4) Somewhat Uncomfortable
- (5) Very uncomfortable

19) How likely would you be to avoid your colleague if you found out he/she were abusing opioids?

- (1) Very likely

- (2) Likely
- (3) Neutral
- (4) Unlikely
- (5) Very unlikely

20) How likely would you shake the hands and explain the importance of “addiction-free” to a patient who usually picks up multiple opioid prescriptions?

- (1) Most likely
- (2) Likely
- (3) Neutral
- (4) Unlikely
- (5) Very unlikely

21) How often is there mutual respect between pharmacy staff and patients who have misuse opioid prescriptions?

- (1) Daily
- (2) Several times a week
- (3) 2-3 times a week
- (4) Once a week
- (5) Never

#### **Part 4: Demographics**

22) What is your age in years?

23) Which of the following apply for you? P1-P4

24) What is your sex? Female/ Male

25) How many years have you lived in the community you currently work in?

26) Did you work in a retail setting prior to pharmacy school? Yes/No

27) If yes, in which state did you work?

28) Before starting pharmacy school, what was the zip code for your county?

29) Which of the followings best describes your ethnic background?

- (1) Asian/Pacific Islander
- (2) Black/African American
- (3) Native American

- (4) White
- (5) Other: Please Specify
- (6) Prefer not to disclose
